# Supplementary material for: Rational design of oxygen deficient TiO2−x nanoparticles conjugated with chlorin e6 (Ce6) for photoacoustic imaging-guided photothermal/photodynamic dual therapy of cancer
Source: Royal Society of Chemistry journal article supplement (doi:10.1039/c9nr09423g), 2019-12-17
Supplement: c9nr09423g1.pdf [file c9nr09423g1.pdf]

## Electronic supplementary information

### **Rational Design of Oxygen Deficient TiO<sub>2-x</sub> Nanoparticles Conjugated with Chlorin e6 (Ce6) for Photoacoustic Imaging- Guided Photothermal/Photodynamic Dual Therapy of Cancer**

Xiaodan Jiao<sup>a, b</sup>, Wei Zhang<sup>c</sup>, Lei Zhang<sup>d</sup>, Yang Cao<sup>c</sup>, Zhigang Xu<sup>a, b</sup>, Yuejun Kang<sup>a, b</sup>,  
Peng Xue<sup>a, b,\*</sup>

<sup>a</sup> Key Laboratory of Luminescent and Real-Time Analytical Chemistry (Southwest University), Ministry of Education, School of Materials and Energy, Southwest University, Chongqing 400715, China.

<sup>b</sup> Chongqing Engineering Research Center for Micro-Nano Biomedical Materials and Devices, Southwest University, Chongqing 400715, China.

<sup>c</sup> Chongqing Key Laboratory of Ultrasound Molecular Imaging, Institute of Ultrasound Imaging, Second Affiliated Hospital, Chongqing Medical University, Chongqing, 400010, China.

<sup>d</sup> Institute of Sericulture and System Biology, Southwest University, Chongqing 400716, China.

Correspondence: [xuepeng@swu.edu.cn](mailto:xuepeng@swu.edu.cn) (P. Xue)

## Supplementary methods

### Materials

Titanium dioxide nanopowder (20 nm) was purchased from Shanghai Macklin Biochemical Co., Ltd (China). Chlorin e6 (Ce6) was ordered from Frontier Scientific, Inc. (USA). Sodium borohydride (NaBH<sub>4</sub>), (3-aminopropyl)triethoxysilane (APTES), N-hydroxysuccinimide (NHS), 1-ethyl-3-(3-dimethylaminopropyl)carbodiimide (EDC), 1,3-diphenyl-isobenzofuran (DPBF), 2',7'-dichlorodihydrofluorescein diacetate (DCFH-DA), thiazolyl blue tetrazolium bromide (MTT, 98%), dimethyl sulfoxide (DMSO), propidium iodide (PI), and 1,3-diphenyl-isobenzofuran (DPBF) were purchased from Sigma-Aldrich (USA). Phosphate buffered saline (PBS), modified Dulbecco's modified eagle's medium (DMEM), 4',6-diamidino-2-phenylindole (DAPI), JC-1 staining kit, calcein AM, propidium iodide (PI) and One Step TUNEL Apoptosis Assay Kit were ordered from Beyotime Biotechnology (China). 2',7'-Dichlorofluorescein diacetate (DCFH-DA) was acquired from GEN-VIEW Scientific Inc. (USA). The female BALB/c and Kunming (KM) mice (4-6 weeks) were purchase from Chengdu Dossy Experimental Animals Co., Ltd (China). Deionized (DI) water was collected from an ultrapure water system (Milli-Q, Molsheim, France).

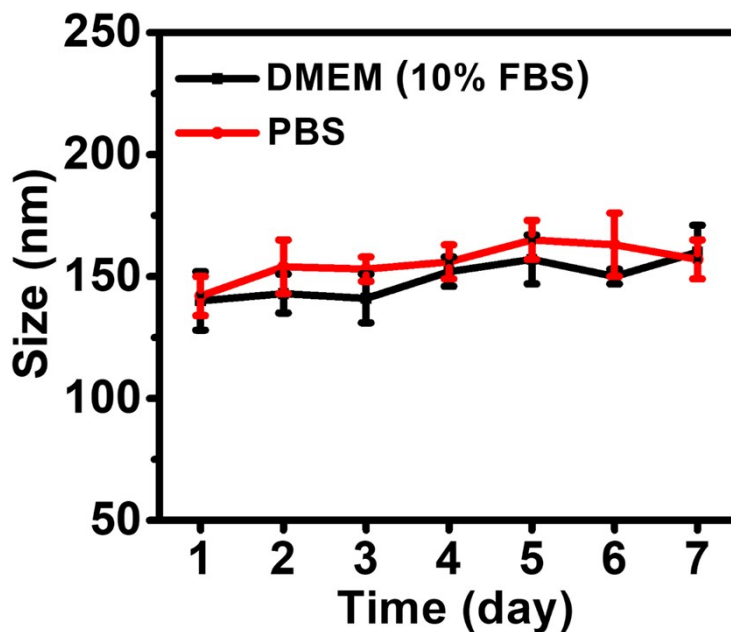

**Fig. S1** Variation in the hydrodynamic size of ZPC NPs in PBS or DMEM (with 10% FBS) during the incubation course for 7 days.

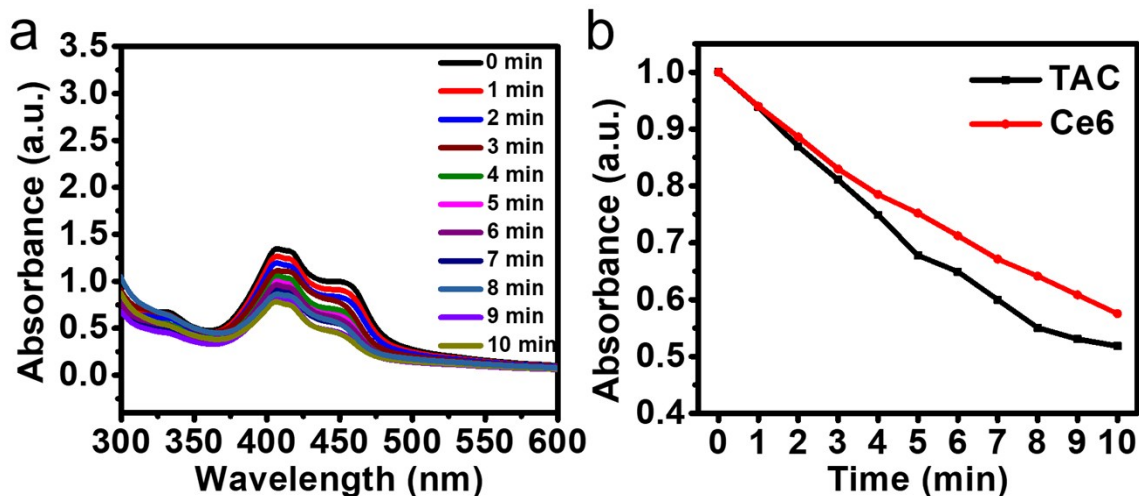

**Fig. S2** (a) UV-vis-NIR absorption spectra of Ce6 ( $5 \mu\text{g}\cdot\text{mL}^{-1}$ ) containing DPBF exposed to a 660 nm laser ( $0.57 \text{ W}\cdot\text{cm}^{-2}$ ) for different periods; (b) decay of the normalized peak absorbance intensity of Ce6 and TAC NPs (equivalent Ce6 concentration:  $5 \mu\text{g}\cdot\text{mL}^{-1}$ ) at 417 nm over time.

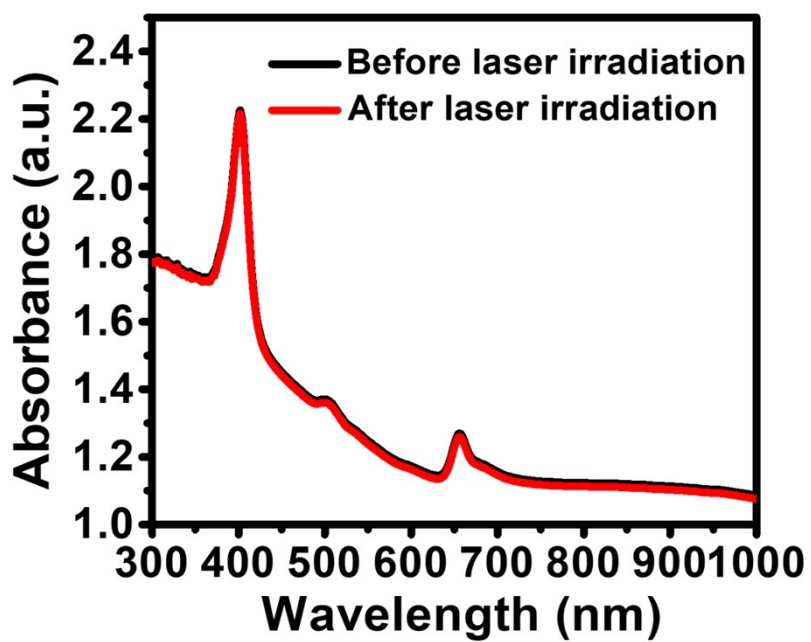

**Fig. S3** Optical absorption spectrum of TAC NP dispersion ( $200 \mu\text{g}\cdot\text{mL}^{-1}$ ) before and after periodic laser irradiation corresponding to Fig. 3j.

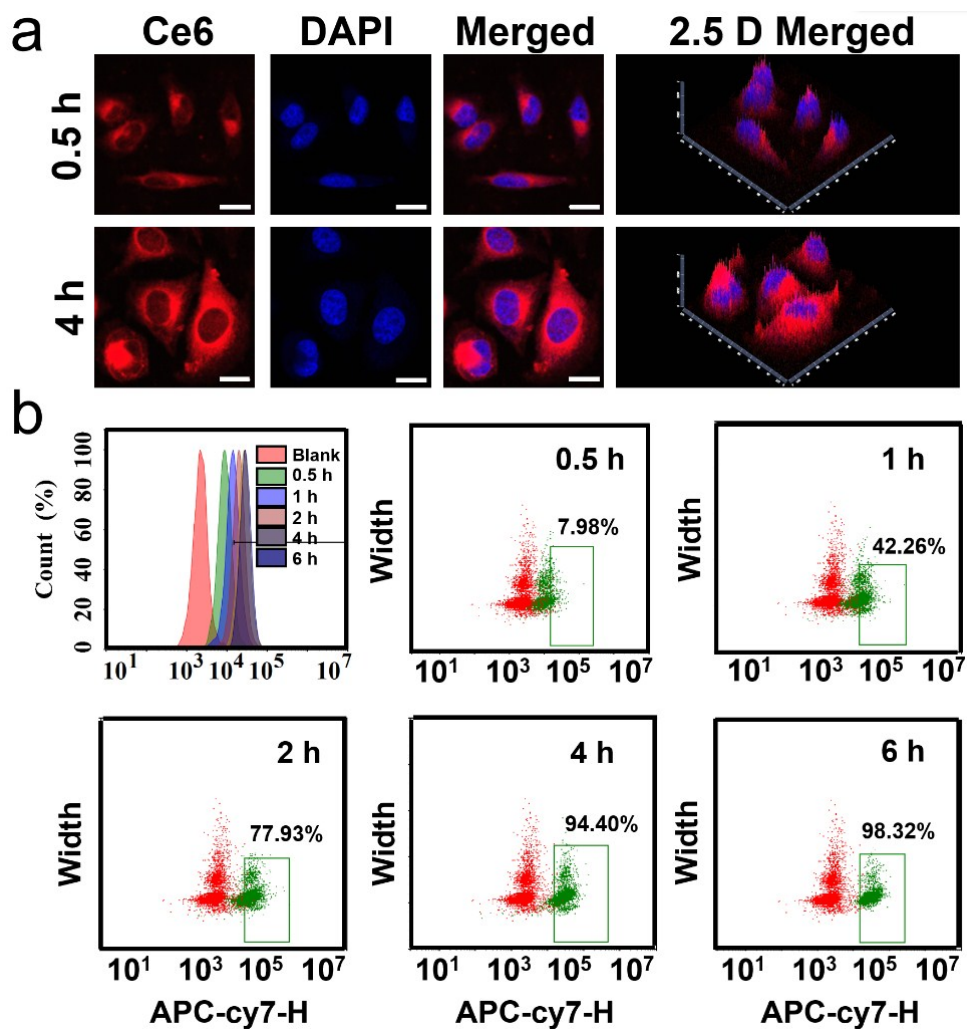

**Fig. S4** Cellular uptake of TAC NPs. (a) LSCM images of HeLa cells after treated by TAC NPs (equivalent Ce6 concentration:  $10 \mu\text{g}\cdot\text{mL}^{-1}$ ) for 0.5 and 4 h (scale bar:  $20 \mu\text{m}$ ); (b) flow cytometry assay using HeLa cells being exposed to TAC NPs (equivalent Ce6 concentration:  $10 \mu\text{g}\cdot\text{mL}^{-1}$ ) for 0.5, 1, 2, 4 and 6 h.

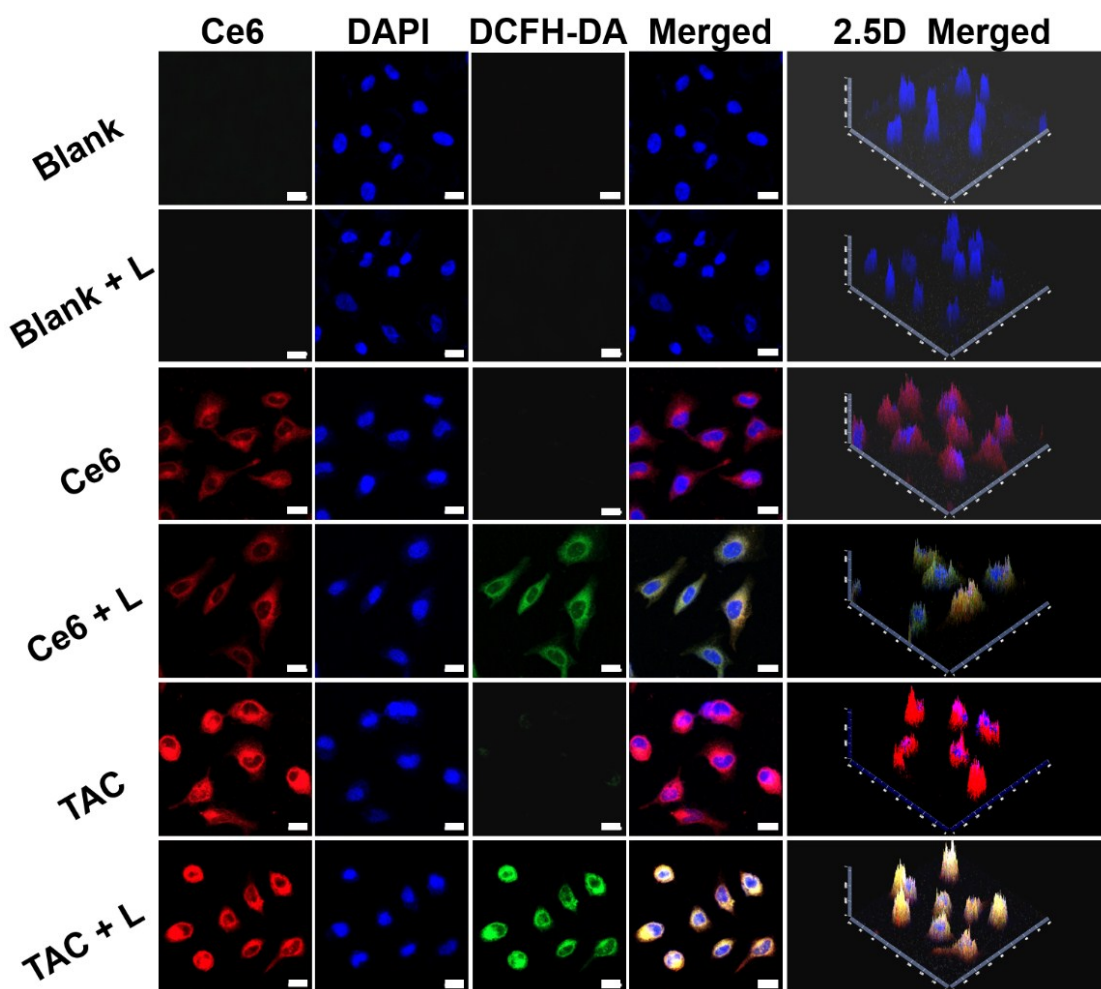

**Fig. S5** Intracellular ROS generation of HeLa cells after incubated with Ce6 or TAC NPs (equivalent Ce6 concentration:  $10 \mu\text{g}\cdot\text{mL}^{-1}$ ) for 4 h subject to laser irradiation (660 nm,  $0.57 \text{ W}\cdot\text{cm}^{-2}$ ) where applicable using DCFH-DA probe (scale bar:  $20 \mu\text{m}$ ).

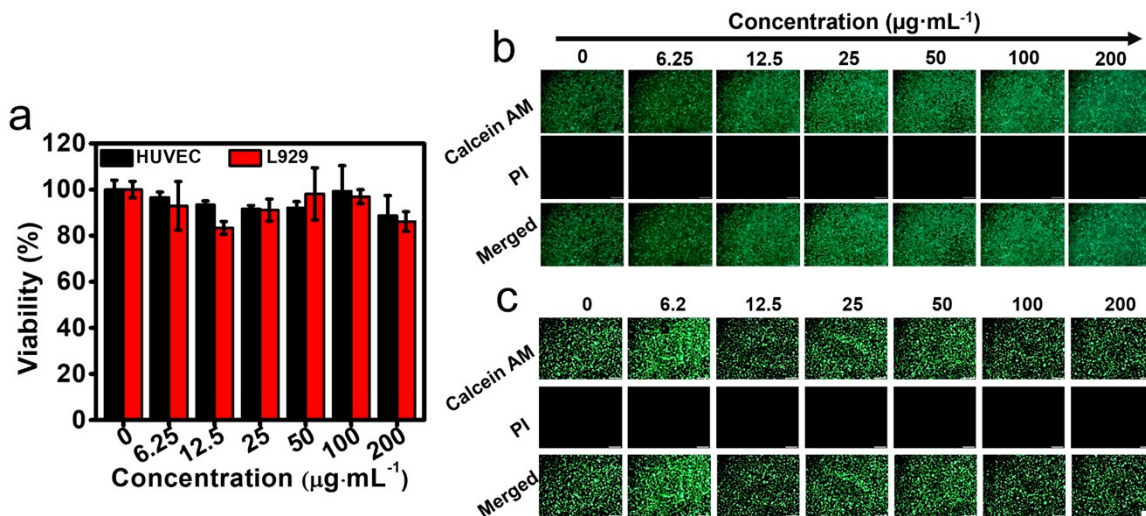

**Fig. S6** Biocompatibility assessment. (a) Cell viability of HUVECs and L929s administered with TAC NPs at different concentrations for 24 h; (b) HUVECs or (c) L929s treated by TAC NPs at different concentrations for 24 h and stained by calcein AM and PI (scale bar: 100  $\mu\text{m}$ ).

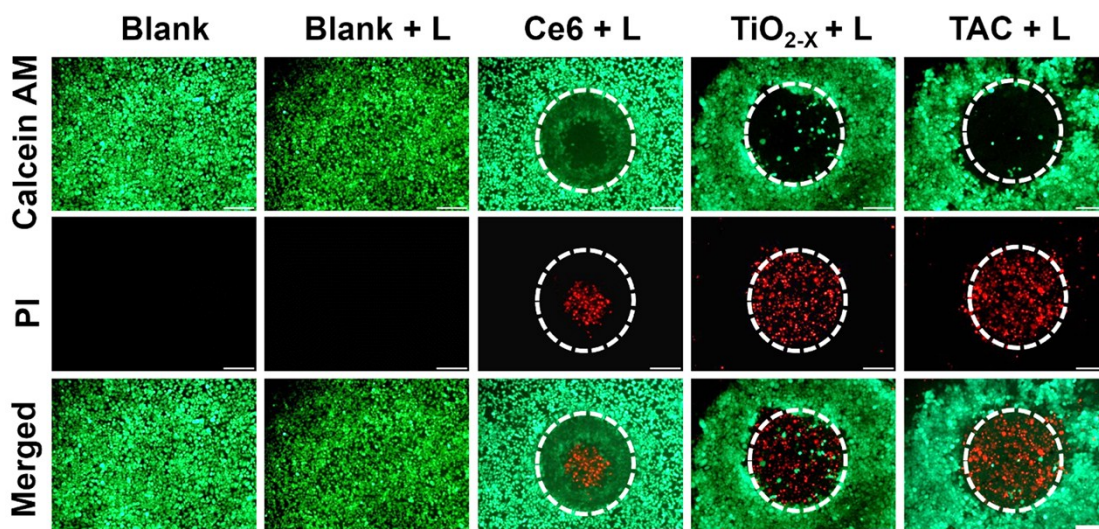

**Fig. S7** Fluorescence images of HeLa cells subject to various treatments and stained by calcein AM and PI (scale bar: 200  $\mu\text{m}$ ). Enclosed area by white dotted circle denotes the laser irradiation spot. Live and dead cells were labeled with green and red fluorescence, respectively.

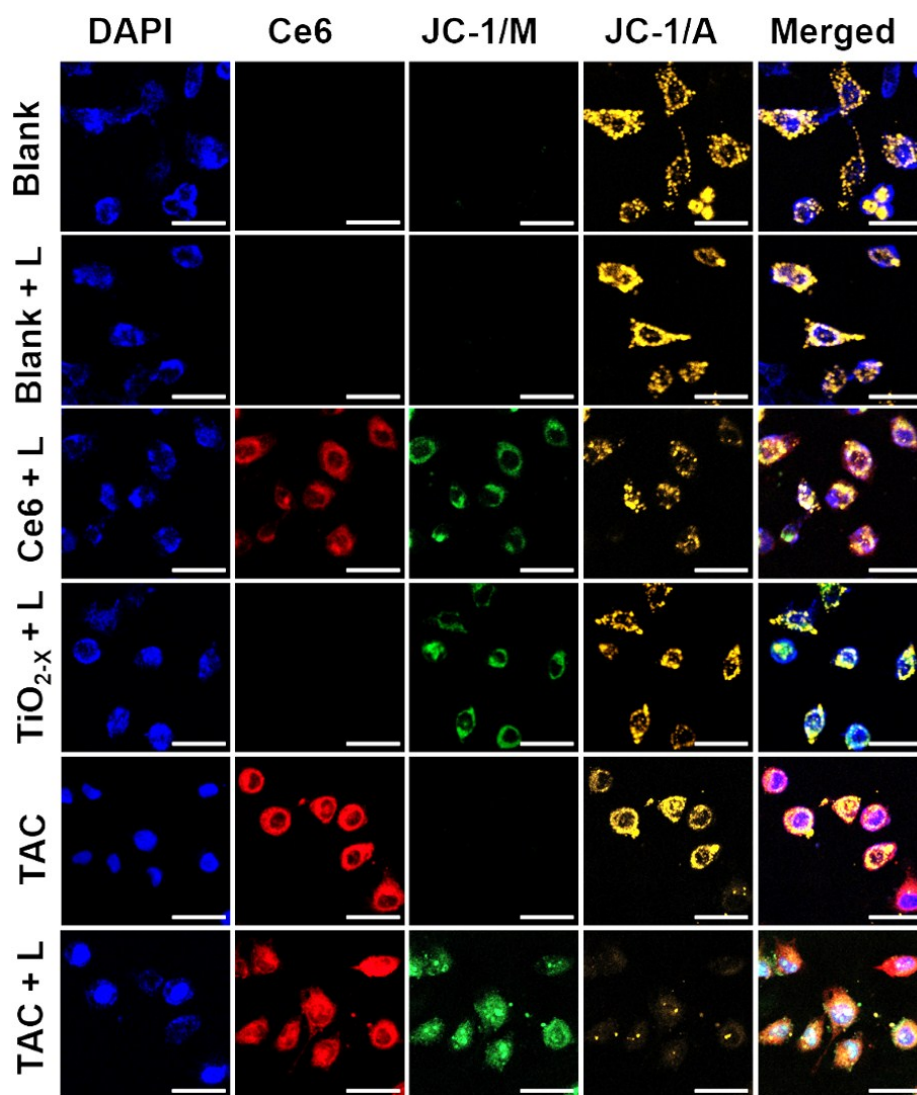

**Fig. S8** LSCM images of HeLa cells subject to different treatments, and stained by JC-1 and DAPI (scale bar: 50  $\mu\text{m}$ ). JC-1/M and JC-1/A represent the monomer and aggregate form of JC-1, respectively.



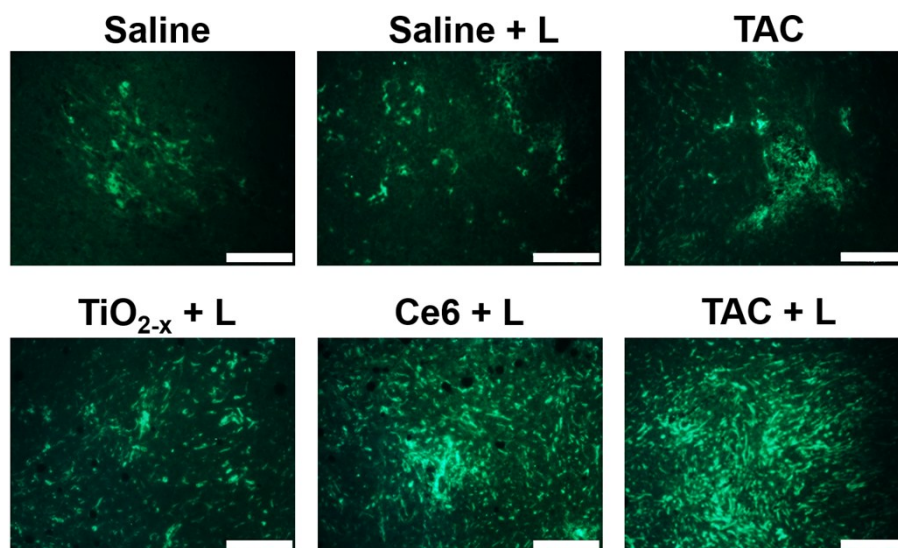

**Fig. S9** Histological staining of tumor slices via Hypoxyprobe-1 to indicate the hypoxia level after various treatments (scale bar: 100  $\mu\text{m}$ ).

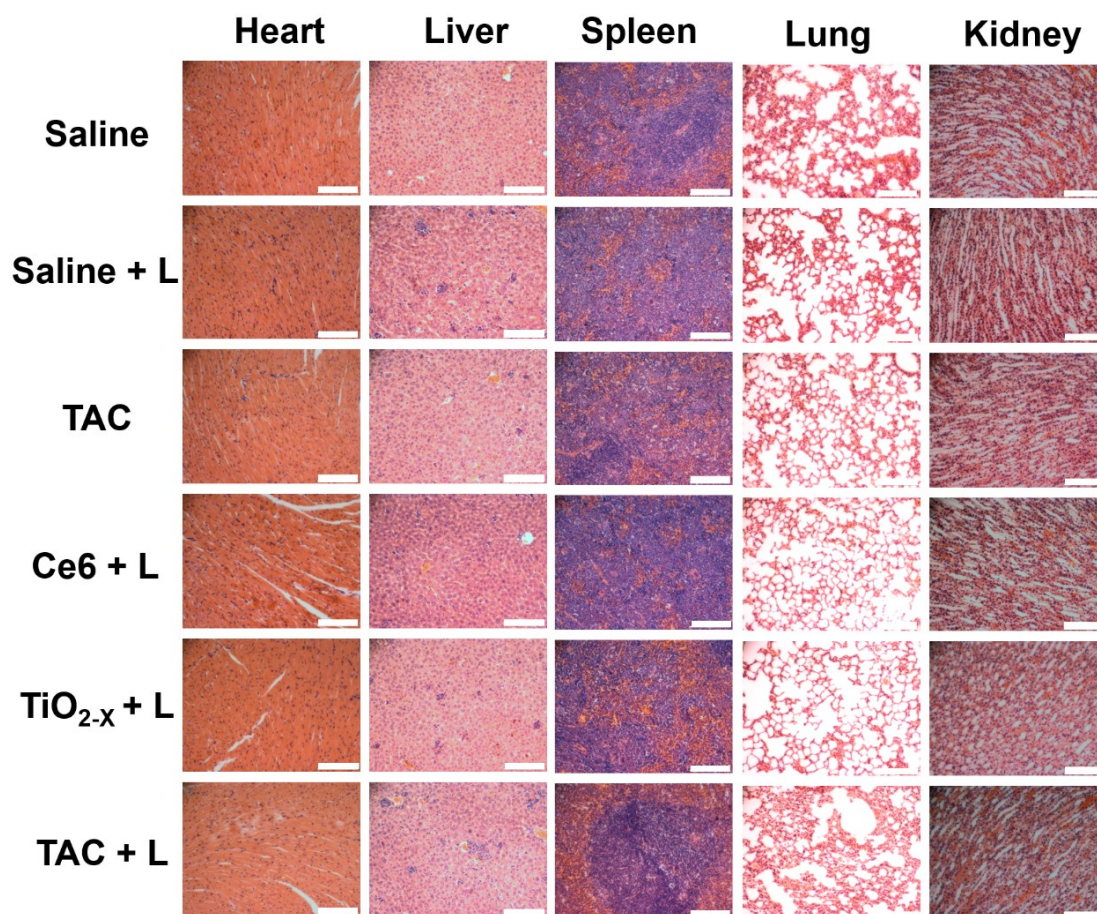

**Fig. S10** H&E stained tumor slices from major organs excised from the groups subject to various treatments (scale bars: 100  $\mu$ m).

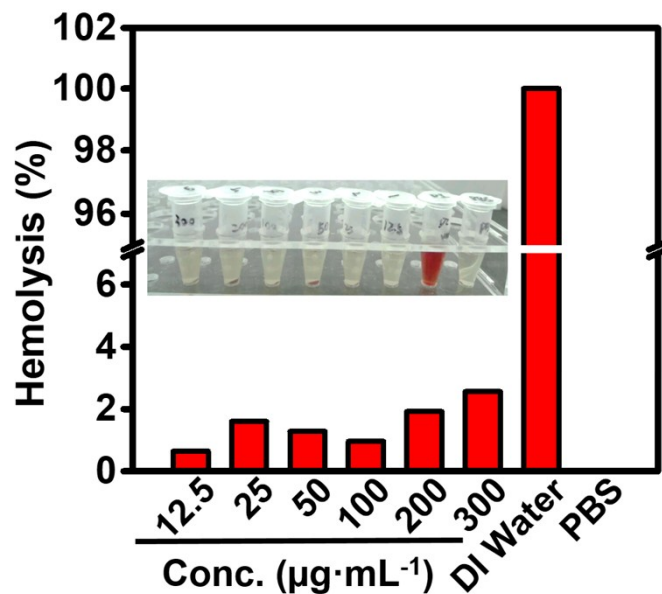

**Fig. S11** Hemolysis rate by incubating RBCs with DI water (positive control), PBS (negative control) or TAC NPs under various concentrations. (Inset: corresponding digital images of tubes containing different samples).

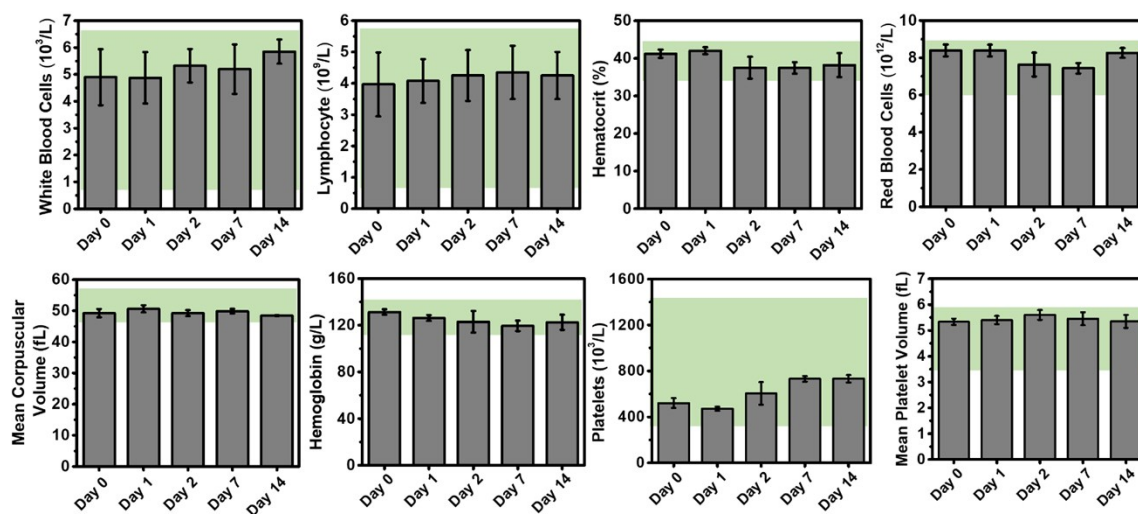

**Fig. S12** Key indicators of blood routine test after KM mice being injected with TAC NPs. The olive hatched areas stand for the reference ranges of hematology index of healthy mice.
